# Supplementary material for: CD14 dictates differential activation of mesenchymal stromal cells through AKT, NF-κB and P38 signals
Source: PubMed Central journal article supplement (PMC6609595; doi:10.1042/bsr20190807), 2019-07-05
Supplement: bsr20190807_supp1.pdf [file bsr20190807_supp1.pdf]

**Table S1**

|             |                                                           |
|-------------|-----------------------------------------------------------|
| Human TLR1  | F: CCACGTTCCCTAAAGACCTATCCC<br>R: CCAAGTGCTTGAGGTTACAG    |
| Human TLR2  | F: ATCCTCCAATCAGGCTTCTCT<br>R: GGACAGGTCAAGGCTTTTTACA     |
| Human TLR3  | F: TTGCCTTGTATCTACTTTTGGGG<br>R: TCAACACTGTTATGTTTGTGGGT  |
| Human TLR4  | F: TTTGGACAGTTTCCCACATTGA<br>R: AAGCATTCCCACCTTTGTTGG     |
| Human TLR5  | F: GCCGGTCCTGTGTTTGAAT<br>R: GGTGAGGTTGCAGAAACGATAAA      |
| Human TLR6  | F: TTCTCCGACGGAAATGAATTTGC<br>R: CAGCGGTAGGTCTTTTGAAC     |
| Human TLR7  | F: TCCTTGGGGCTAGATGGTTTC<br>R: TCCACGATCACATGGTTCTTTG     |
| Human TLR8  | F: ATGTTCCCTTCAGTCGTCAATGC<br>R: TTGCTGCACTCTGCAATAACT    |
| Human TLR9  | F: CTGCCTTCCTACCCTGTGAG<br>R: GGATGCGGTTGGAGGACAA         |
| Human TLR10 | F: AGGTTTGAGTGGGGCAAAAAT<br>R: CCATCACGCAAAGAACCAG        |
| Human IDO   | F: GCCAGCTTCGAGAAAGAGTTG<br>R: ATCCCAGAAGTAGACGTGCAA      |
| Human COX2  | F: CTGGCGCTCAGCCATACAG<br>R: CGCACTTATACTGGTCAAATCCC      |
| Human TSG6  | F: TTTCTCTTGCTATGGGAAGACAC<br>R: GAGCTTGTATTTGCCAGACCG    |
| Human IL6   | F: ACTCACCTCTTCAGAACGAATTG<br>R: CCATCTTTGGAAGGTTTCAGGTTG |
| Human IL8   | F: TTTTGCCAAGGAGTGCTAAAGA<br>R: AACCTCTGCACCCAGTTTTTC     |
| Human CCL2  | F: CAGCCAGATGCAATCAATGCC<br>R: TGGAATCCTGAACCCACTTCT      |
| Mouse TLR1  | F: TTTGTCCCACAATGAGCTAAAGG<br>R: TTCTTTGCATATAGGCAGGGC    |
| Mouse TLR2  | F: CTCTTCAGCAAACGCTGTTCT<br>R: GGCGTCTCCCTCTATTGTATTG     |
| Mouse TLR3  | F: GTGAGATACAACGTAGCTGACTG<br>R: TCCTGCATCCAAGATAGCAAGT   |
| Mouse TLR4  | F: GCCTTTCAGGGAATTAAGCTCC<br>R: GATCAACCGATGGACGTGTAAA    |
| Mouse TLR5  | F: TGGGGACCCAGTATGCTAACT<br>R: CCACAGGAAAACAGCCGAAGT      |

|            |                                                         |
|------------|---------------------------------------------------------|
| Mouse TLR6 | F: AGCCAAGACAGAAAACCCATC<br>R: GGGGTCATGCTTCCGACTAT     |
| Mouse TLR7 | F: ATGTGGACACGGAAGAGACAA<br>R: ACCATCGAAACCCAAAGACTC    |
| Mouse TLR8 | F: TTCCAGAAGCTATCCTTGTGACG<br>R: CATGCAGTTGACGATGGTTGC  |
| Mouse TLR9 | F: ATGGTTCTCCGTCTGAAGGACT<br>R: GAGGCTTCAGCTCACAGGG     |
| Mouse iNOS | F: GTTCTCAGCCCAACAATACAAGA<br>R: GTGGACGGGTTCGATGTCAC   |
| Mouse COX2 | F: TTCCAATCCATGTCAAACCGT<br>R: AGTCCGGGTACAGTCACACTT    |
| Mouse IL6  | F: CTGCAAGAGACTTCCATCCAG<br>R: AGTGGTATAGACAGGTCTGTTGG  |
| Mouse IL12 | F: CAATCACGCTACCTCCTCTTTT<br>R: CAGCAGTGCAGGAATAATGTTTC |
